# Supplementary material for: Dysregulation of Immune Response Mediators and Pain-Related Ion Channels Is Associated with Pain-like Behavior in the GLA KO Mouse Model of Fabry Disease
Source: MDPI journal article supplement (doi:10.3390/cells11111730), 2022-05-24
Supplement: s1 [file s1]

## Supplementary Materials

**Supplementary Table S1. Inflammation-associated gene expression array targets.** List of genes investigated with the gene expression array including targets associated with apoptosis, angiogenesis, angiotensin, endothelin, inflammation, and immune adhesion.

| Target gene   | Target protein                                      | Single qRT PCR Validation (yes/no) |
|---------------|-----------------------------------------------------|------------------------------------|
| <i>ACE</i>    | Angiotensin-converting enzyme                       | no                                 |
| <i>AGTR2</i>  | Type-2 angiotensin II receptor                      | no                                 |
| <i>BAX</i>    | Apoptosis regulator BAX                             | no                                 |
| <i>BCL2</i>   | Apoptosis regulator Bcl 2                           | yes                                |
| <i>BCL2l1</i> | Bcl-2-like protein 1                                | no                                 |
| <i>C3</i>     | Complement 3                                        | yes                                |
| <i>CCL19</i>  | C-C motif chemokine 19                              | no                                 |
| <i>CCL2</i>   | C-C motif chemokine 2                               | yes                                |
| <i>CCL3</i>   | C-C motif chemokine 3                               | no                                 |
| <i>CCL5</i>   | C-C motif chemokine 5                               | yes                                |
| <i>CCR2</i>   | C-C chemokine receptor type 2                       | no                                 |
| <i>CCR4</i>   | C-C chemokine receptor type 4                       | no                                 |
| <i>CCR7</i>   | C-C chemokine receptor type 7                       | no                                 |
| <i>CD19</i>   | B-lymphocyte antigen CD19                           | no                                 |
| <i>CD28</i>   | T-cell-specific surface glycoprotein CD28           | yes                                |
| <i>CD34</i>   | Hematopoietic progenitor cell antigen CD34          | no                                 |
| <i>CD38</i>   | ADP-ribosyl cyclase/cyclic ADP-ribose hydrolase 1   | no                                 |
| <i>CD3e</i>   | T-cell surface glycoprotein CD3 epsilon chain       | no                                 |
| <i>CD4</i>    | T-cell surface glycoprotein CD4                     | yes                                |
| <i>CD40</i>   | Tumor necrosis factor receptor superfamily member 5 | yes                                |
| <i>CD40lg</i> | Cluster of Differentiation 40 ligand                | yes                                |
| <i>CD68</i>   | Macrosialin                                         | yes                                |
| <i>CD80</i>   | T-lymphocyte activation antigen CD80                | yes                                |
| <i>CD86</i>   | T-lymphocyte activation antigen CD86                | no                                 |
| <i>CD8a</i>   | T-cell surface glycoprotein CD8 alpha chain         | no                                 |
| <i>CSF1</i>   | Macrophage colony-stimulating factor 1              | no                                 |
| <i>CSF2</i>   | Granulocyte-macrophage colony-stimulating factor    | no                                 |
| <i>CTLA4</i>  | Cytotoxic T-lymphocyte protein 4                    | no                                 |
| <i>CXCL10</i> | C-X-C motif chemokine 10                            | no                                 |
| <i>CXCL11</i> | C-X-C motif chemokine 11                            | no                                 |
| <i>CXCR3</i>  | C-X-C chemokine receptor type 3                     | no                                 |
| <i>EDN1</i>   | Endothelin-1                                        | no                                 |
| <i>FAS</i>    | Tumor necrosis factor receptor superfamily member 6 | no                                 |
| <i>FASL</i>   | ADAM10-processed FasL form                          | no                                 |
| <i>FN1</i>    | Fibronectin                                         | no                                 |

|               |                                                         |     |
|---------------|---------------------------------------------------------|-----|
| <i>GZMB</i>   | Granzyme B (G, H)                                       | no  |
| <i>H2-Eb1</i> | H-2 class II histocompatibility antigen, I-A beta chain | no  |
| <i>Hmox1</i>  | Heme oxygenase 1                                        | yes |
| <i>ICAM1</i>  | Intercellular adhesion molecule 1                       | yes |
| <i>ICOS</i>   | Inducible T-cell costimulator                           | no  |
| <i>IFNG</i>   | Interferon gamma                                        | no  |
| <i>IKBKB</i>  | Inhibitor of nuclear factor kappa-B kinase subunit beta | yes |
| <i>IL10</i>   | Interleukin 10                                          | yes |
| <i>IL12a</i>  | Interleukin 12a                                         | no  |
| <i>IL12b</i>  | Interleukin 12b                                         | no  |
| <i>IL13</i>   | Interleukin 13                                          | no  |
| <i>IL15</i>   | Interleukin 15                                          | no  |
| <i>IL18</i>   | Interleukin 18                                          | no  |
| <i>IL1a</i>   | Interleukin 1a                                          | no  |
| <i>IL1b</i>   | Interleukin 1b                                          | yes |
| <i>IL2ra</i>  | Interleukin 2 receptor subunit alpha                    | no  |
| <i>IL4</i>    | Interleukin 4                                           | yes |
| <i>IL5</i>    | Interleukin 5                                           | no  |
| <i>IL6</i>    | Interleukin 6                                           | yes |
| <i>IL7</i>    | Interleukin 7                                           | no  |
| <i>LIF</i>    | Leukemia inhibitory factor                              | no  |
| <i>LRP2</i>   | Low-density lipoprotein receptor-related protein 2      | no  |
| <i>LY96</i>   | Lymphocyte antigen 96                                   | no  |
| <i>NFATC3</i> | Nuclear factor of activated T-cells, cytoplasmic 3      | yes |
| <i>NFATC4</i> | Nuclear factor of activated T-cells, cytoplasmic 4      | no  |
| <i>NFKB1</i>  | Nuclear factor NF-kappa-B p105 subunit                  | no  |
| <i>NFKB2</i>  | Nuclear factor NF-kappa-B p100 subunit                  | no  |
| <i>NOS2</i>   | Nitric oxide synthase 2                                 | no  |
| <i>PRF1</i>   | Perforin 1                                              | no  |
| <i>PTGS2</i>  | Prostaglandin G/H synthase 2                            | no  |
| <i>PTPRC</i>  | Receptor-type tyrosine-protein phosphatase C            | no  |
| <i>SELE</i>   | E-selectin                                              | no  |
| <i>SELP</i>   | Selenoprotein P                                         | no  |
| <i>SKI</i>    | Ski oncogene                                            | no  |
| <i>SMAD3</i>  | Mothers against decapentaplegic homolog 3               | no  |
| <i>SMAD7</i>  | Mothers against decapentaplegic homolog 7               | no  |
| <i>SOCS1</i>  | Suppressor of cytokine signaling 1                      | no  |
| <i>SOCS2</i>  | Suppressor of cytokine signaling 2                      | no  |
| <i>STAT1</i>  | Signal transducer and activator of transcription 1      | no  |

|                 |                                                      |                         |
|-----------------|------------------------------------------------------|-------------------------|
| <i>STAT3</i>    | Signal transducer and activator of transcription 3   | yes                     |
| <i>STAT4</i>    | Signal transducer and activator of transcription 4   | no                      |
| <i>STAT6</i>    | Signal transducer and activator of transcription 6   | no                      |
| <i>TBX21</i>    | T-box transcription factor TBX21                     | no                      |
| <i>TGF1B</i>    | Transforming growth factor 1 beta                    | yes                     |
| <i>TNFa</i>     | Tumor necrosis factor alpha                          | yes                     |
| <i>TNFRSF18</i> | Tumor necrosis factor receptor superfamily member 18 | no                      |
| <i>VCAM1</i>    | Vascular cell adhesion protein 1                     | no                      |
| <i>VEGFa</i>    | Vascular endothelial growth factor A                 | yes                     |
| <i>18s</i>      | 18s ribosomal RNA subunit                            | no - endogenous control |
| <i>GAPDH</i>    | Glyceraldehyde-3-phosphate dehydrogenase             | no - endogenous control |
| <i>GUSB</i>     | Beta-glucuronidase                                   | no - endogenous control |
| <i>HPRT1</i>    | Hypoxanthine-guanine phosphoribosyltransferase       | no - endogenous control |

**Supplementary Table S2. Additional inflammation-associated gene expression assays.** Listed genes investigated with single qRT PCR analysis including targets associated with inflammation. Genes were not included in the gene expression array listed under Table S1.

| Target gene  | Target protein                                  |
|--------------|-------------------------------------------------|
| <i>CASP3</i> | Caspase 3                                       |
| <i>GFAP</i>  | Glial fibrillary acidic protein                 |
| <i>LRG1</i>  | Leucine-rich alpha-2-glycoprotein 1             |
| <i>NLRP3</i> | NACHT, LRR and PYD domains-containing Protein 3 |
